# Supplementary material
Source: publisher figshare collection journal article supplement (https://future-science-group.figshare.com/ndownloader/files/27773844)
Supplement: Supplementary file 1 [file 27773844]

**Supplementary Appendix**

**Heterogeneity analyses**

- **Poor-risk patients**

Q=1.03; df=2; I2=0%

- **Intermediate-risk patients**

Q=1.53; df=2; I2=0%

- **Favorable-risk patients**

Q=1.03; df=2; I2=39%


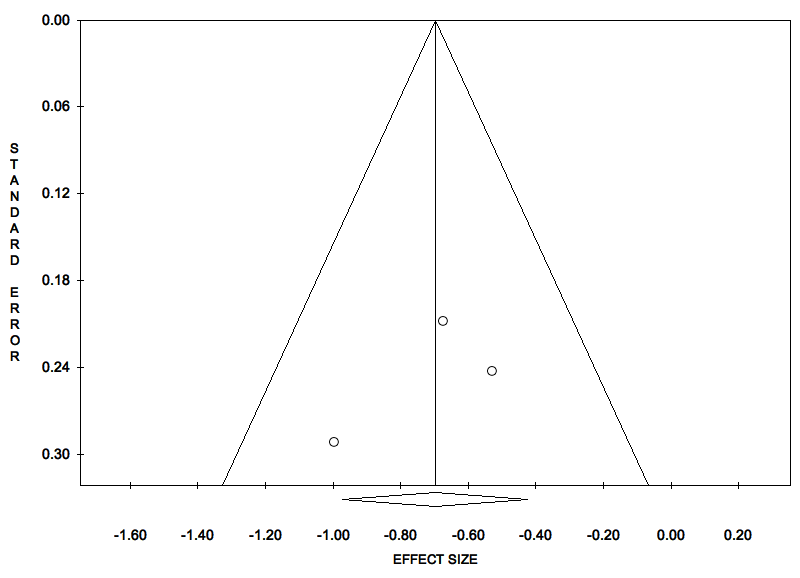


**Supplementary Figure 1**. Funnel Plot of the Overall Survival (OS) in poor-risk patients, according to IMDC criteria (immune checkpoint inhibitors plus tyrosine kinase inhibitors versus sunitinib monotherapy).


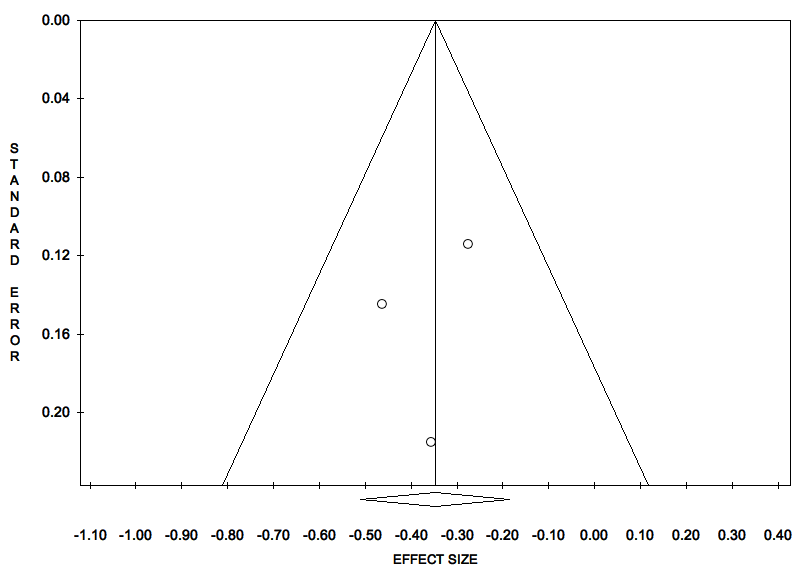


**Supplementary Figure 2**. Funnel Plot of the Overall Survival (OS) in intermediate-risk patients, according to IMDC criteria (immune checkpoint inhibitors plus tyrosine kinase inhibitors versus sunitinib monotherapy).


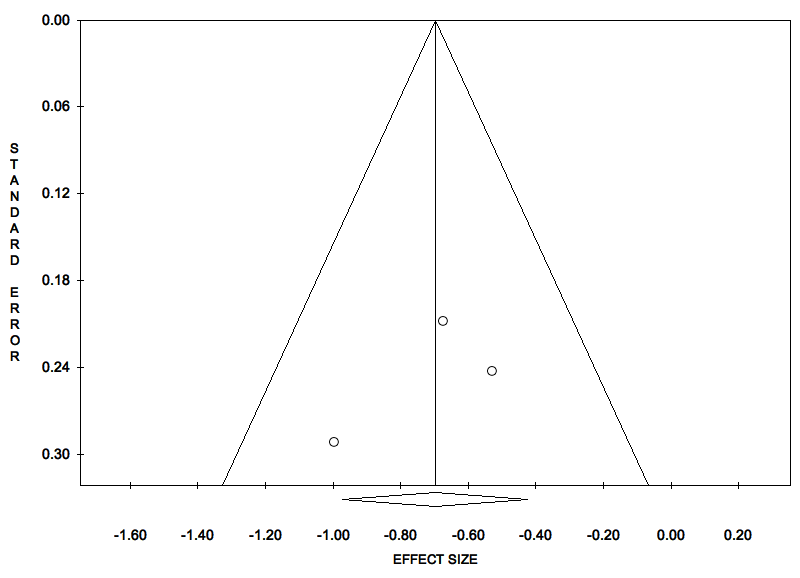


**Supplementary Figure 3**. Funnel Plot of the Overall Survival (OS) in favorable-risk patients, according to IMDC criteria (immune checkpoint inhibitors plus tyrosine kinase inhibitors versus sunitinib monotherapy).
